# Supplementary material for: p300 is upregulated by docetaxel and is a target in chemoresistant prostate cancer
Source: PubMed Central journal article supplement (PMC7040497; doi:10.1530/erc-19-0488), 2020-01-17
Supplement: supplementary_figure_1.pdf [file supplementary_figure_1.pdf]

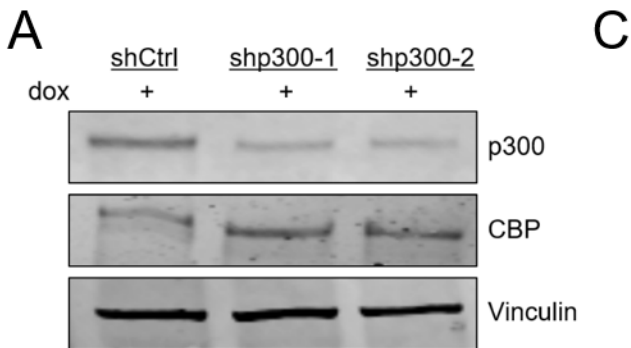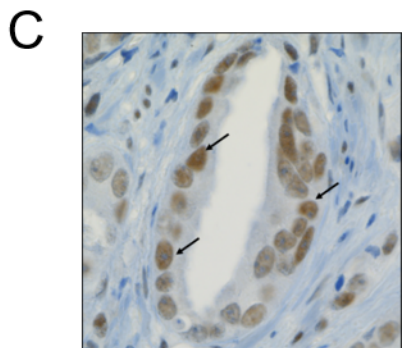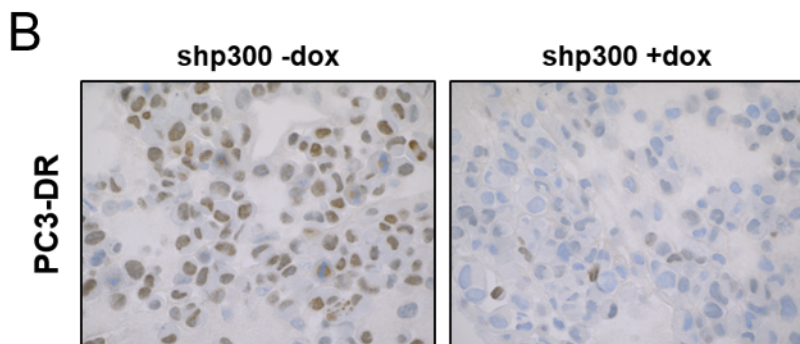

Supplementary figure 1
